# Supplementary material
Source: PubMed Central journal article supplement (PMC10530560)
Supplement: NIHMS1919519-supplement-Supplementary_Information.pdf [file NIHMS1919519-supplement-Supplementary_Information.pdf]

## Supplementary Information

### Chemokine Binding to PSGL-1 is Controlled by O-Glycosylation and Tyrosine Sulfation

#### Supplementary Figure Legends

**Figure S1. Thr44 of PSGL-1 is O-glycosylated. Related to Figure 1, 2.**

a) MALDI spectrum showing the mass of unmodified PSGL-1 peptide and glycosylated peptide. After incubation with GalNAc-T1, there are three peaks corresponding to the unmodified starting peptide, the peptide with one GalNAc- attached and the peptide with two GalNAc attached. b) The novel site of human Thr44 is located closer to the sulfated tyrosines compared to Thr57. The spatial distribution is thus more comparable to the position of the known glycosylation site in the murine PSGL-1 sequence.

**Figure S2. Lectin and antibody staining of the glycosulfopeptide PSGL-1 array. Related to Figure 3.**

A) Microarray was probed with lectin VVA recognizing GalNAc (20  $\mu\text{g}/\text{mL}$ ), lectin AAL recognizing fucose (20  $\mu\text{g}/\text{mL}$ ), antibody to the human PSGL-1 sequence (KPL1, 5  $\mu\text{g}/\text{mL}$ ) and antibody to sulfotyrosine (5  $\mu\text{g}/\text{mL}$ ). Peptide 6 and 8 showed low signals due to the low printing efficiency of these two samples, but the remaining binding patterns confirmed the presence of the PSGL-1 peptide sequence and the modifications. B) Scan of the printed microarray. Peptides with fluorescein show clear fluorescence spots. Position 6 and 8 was not successfully printed, even after repurification and re-printing (not shown). C) Representation of the different glycoforms produced, for human and mouse PSGL-1 and for sulfated and non-sulfated peptides. For a comprehensive list, see Figure 2 and Table S1. Y-axis is average/mean relative fluorescent units (RFUs) and X-axis is glycosulfopeptide ID.

**Figure S3. Chemokine binding to the microarray. Related to Figure 4.**

The microarray was probed with CCL19, CCL21, and CCL5 to investigate the effect of different glycan structures and sulfation status for binding. Y-axis shows the average/mean RFU and x-axis indicates the glycosulfopeptide ID. CCL19 and CCL21 showed very similar

binding with tyrosine sulfation being pivotal for binding, whereas di-sialyl-Lex (**26**) and 2 X SLex (**27**) almost completely abolished the binding of both CCL19 and CCL21 to human PSGL-1. In the mouse sequences, less complex structures such as di-sialyl T and sialylated branch core 2 structures also blocked the CCL19 and CCL21 binding. CCL5 binding is less affected by the glycan structures, but is dependent on tyrosine sulfation and shows weaker binding to mouse PSGL-1 compared to human PSGL-1 peptides. CCL5 also shows binding to the recombinant PSGL-1. After neuraminidase treatment of the array and incubation with CCL19 there was generally lower binding, however the recombinant PSGL-1 was able to bind CCL19. We did not confirm that all sialic acids were removed.

**Figure S4. Recombinant PSGL1 N-terminal O-glycosylation analysis.** Related to MS/MS analysis in Star Methods.

2 µg of protein was digested and analyzed by an Orbitrap Fusion Lumos mass spectrometer to determine the glycosylation status and revealed only glycosylation on Threonine 57 and not Threonine 44. a) HCD MS/MS spectrum of the AspN-treated O-glycopeptide  $_{52}\text{DFLPETEPPPEMLR}_{64}$  containing the O-glycan  $\text{HexNAc}_2\text{Hex}_2\text{Fuc}_1$  m/z 817.3681  $[\text{M}+3\text{H}]^{3+}$ . b) HCD MS/MS spectrum of the tryptic O-glycopeptide  $_{44}\text{TEY}(\text{sulfo})\text{EY}(\text{sulfo})\text{LDY}(\text{sulfo})\text{DFLPETEPPPEMLR}_{64}$  containing the O-glycan  $\text{HexNAc}_2\text{Hex}_2\text{Fuc}_1$  m/z 1256.1367  $[\text{M}+3\text{H}]^{3+}$ .

**Figure S5. Sulfonates cannot substitute tyrosine sulfates for efficient chemokine binding.** Related to Figure 4.

a, b) Recombinant chemokines CCL19 and CCL21 were used to probe binding to a glycosulfopeptide array containing sulfated and sulfonated peptides. The chemokines only bound to the sulfated peptides, whereas c) PL1 antibody (Santa Cruz) recognizing the PSGL-1 N-terminal sequence bound to all peptides. d) Sequences of analyzed peptides. Y in red means tyrosine sulfate, F in red means sulfonated tyrosines.

**Figure S6. Detection and purification of peptides and Enzymatic elongation of glycans and monitoring by MALDI-TOF.** Related to Enzymatic Elongation and HPLC analysis and purification in Star Methods.

(A) HPLC and MALDI profiles of peptide #7 (left) and peptide #17 (right). Two peaks are observed for the released peptide 7# and the re-run of individually purified peaks due to

isomerization of 5- and 6-carboxyfluorescein. The MALDI profile of purified peptide #7 shows one single peak and no contamination. The sulfated peptide #17 shows earlier retention time but also has two peaks due to isomerization 5- and 6-carboxyfluorescein. MALDI analysis of both peaks shows identical masses corresponding to the peptide with 1 and 2 sulfates as the third sites is lost during ionization. MALDI analysis of the combined peaks shows identical masses. (B) Generation of the most complex glycan structure in the glycosulfopeptide library, a di-sialyl-Le<sup>x</sup>. The peptide was synthesized with a core-2 O-glycan as described in materials and methods. The glycan was then sequentially elongated by addition of specific glycosyltransferases and the elongations were confirmed by MALDI-TOF.

### Supplementary Table Legends

**Table S1. Table of all synthesized peptides. Related to Figure 2.**

Peptides sequences with Id number are shown. Glycans and sulfations are shown in brackets for modified peptides. All peptides carry N-terminal fluorescein.

**Table S2. Theoretical observed masses are shown for all peptides. Related to MALDI-TOF analysis of Peptides in Star Methods.**

Calculated masses for sulfated PSGL-1 peptides are shown for the form with 2 sulfates (human) and 1 sulfate (murine) as these represent the major peaks in the corresponding MALDI spectra. Consistent loss of 1 sulfate was observed for the major peaks in all sulfated peptide spectra, due to in-source fragmentation. Masses were internally calibrated using calculated masses of all peptides due to the unavailability of commercial standards spanning the range of masses observed in this set of peptides for negative ionization mode. All MALDI spectra provided in Harvard Dataverse repository (DOI provided in Key Resources Table).

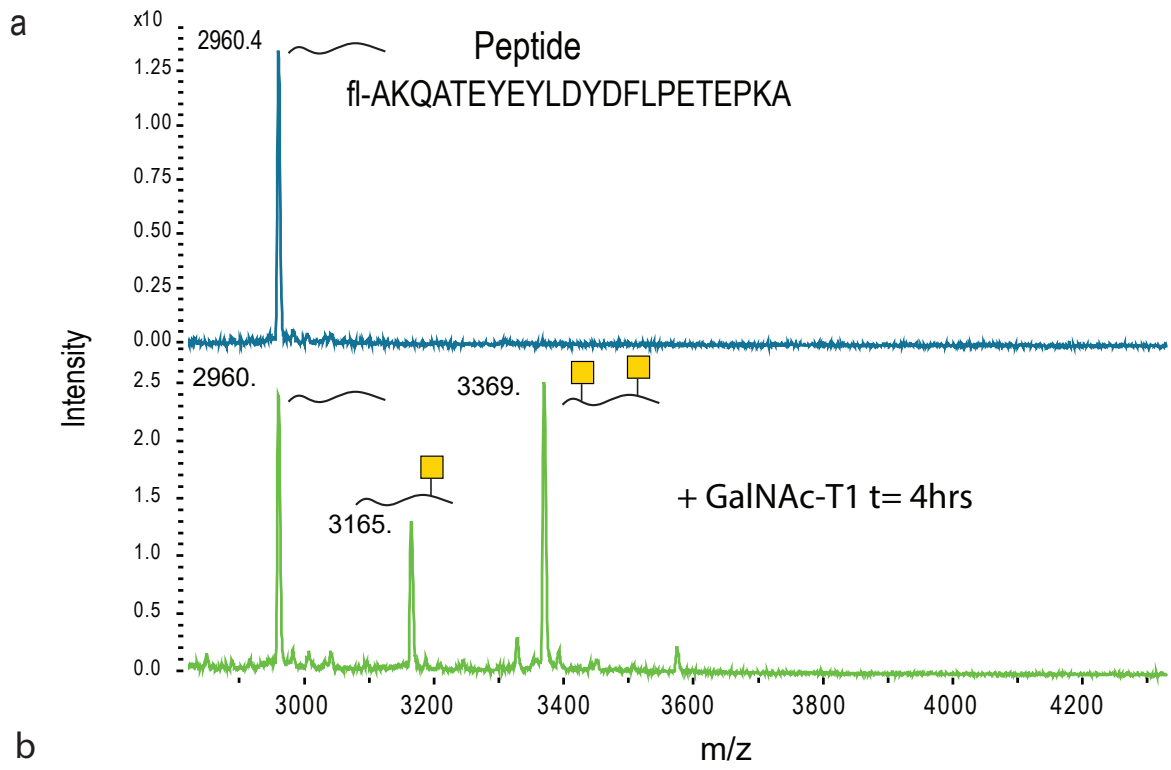

**b**

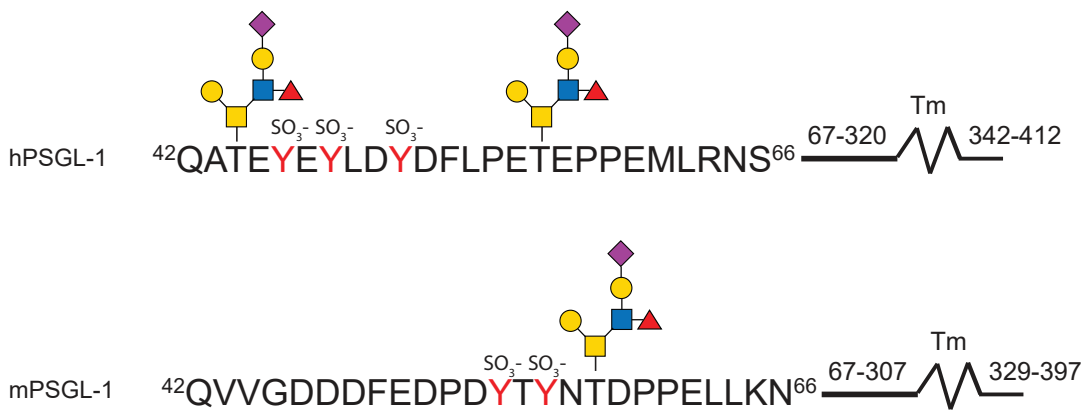

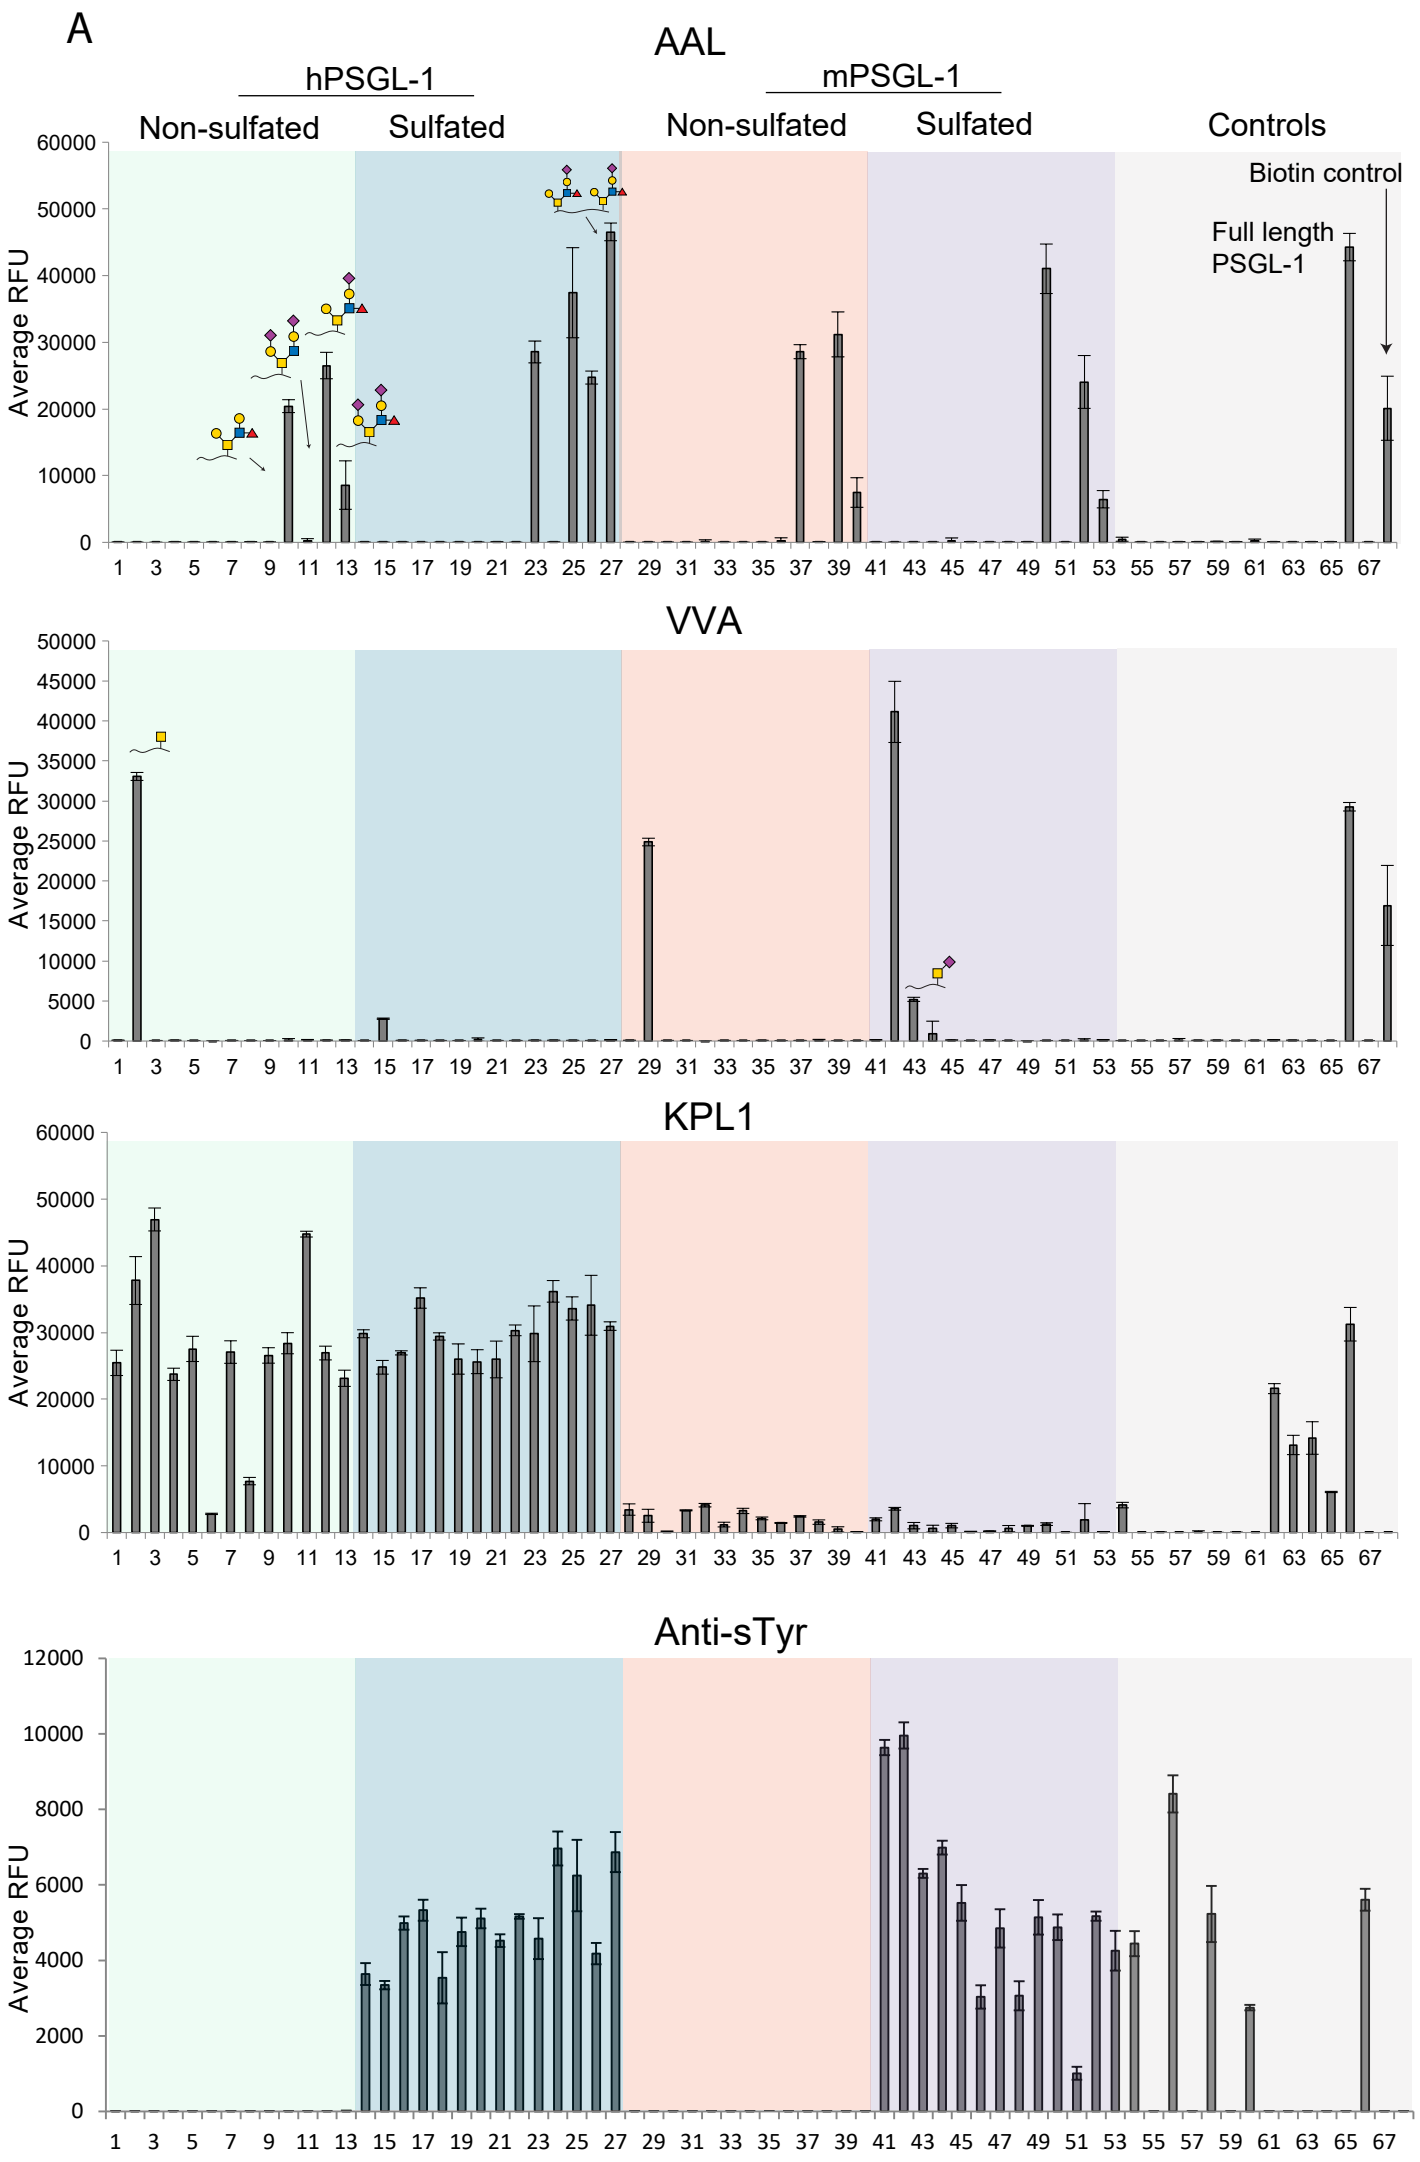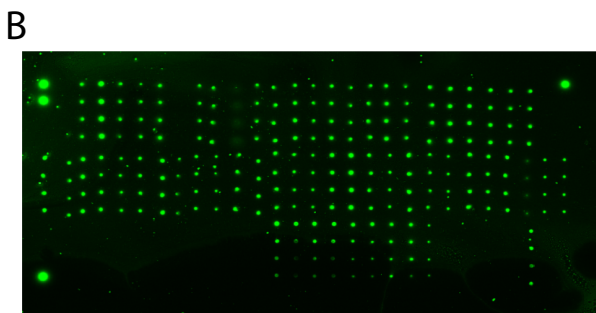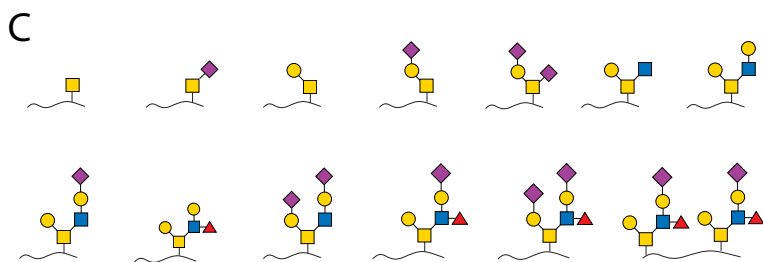

### CCL19 1ug/ml

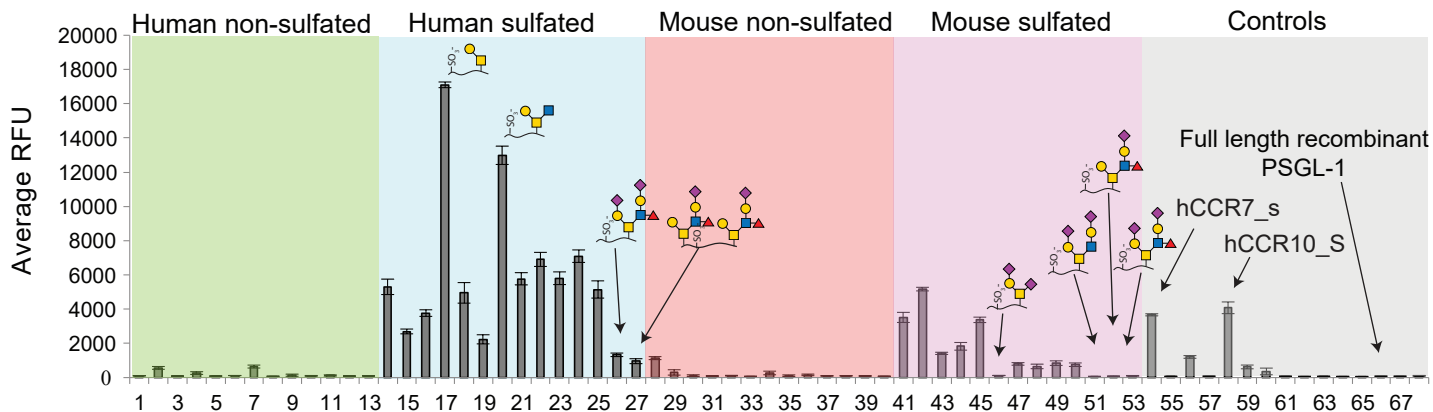

### CCL21 1ug/ml

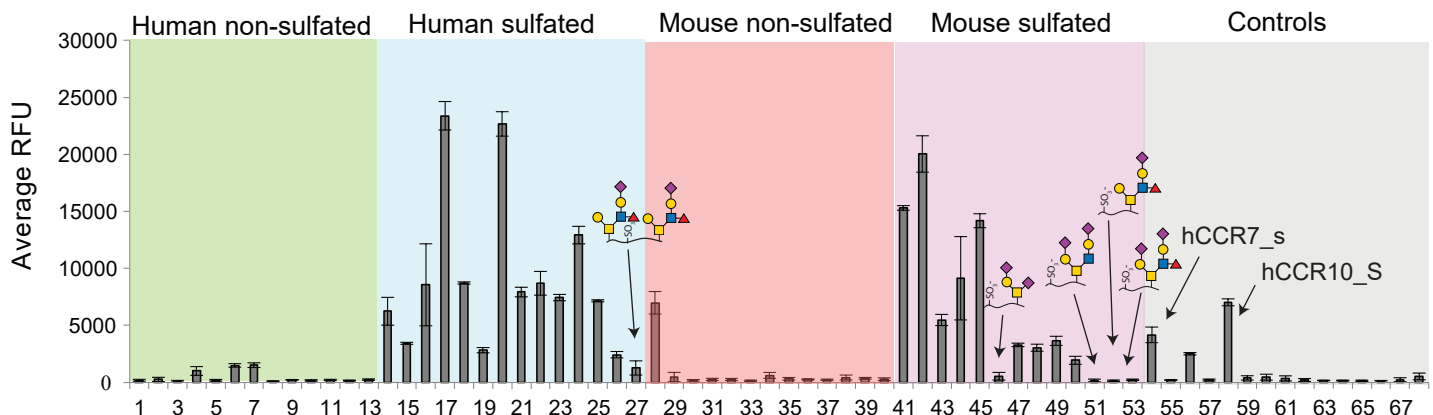

### CCL19 1ug/ml after neuraminidase treatment of array

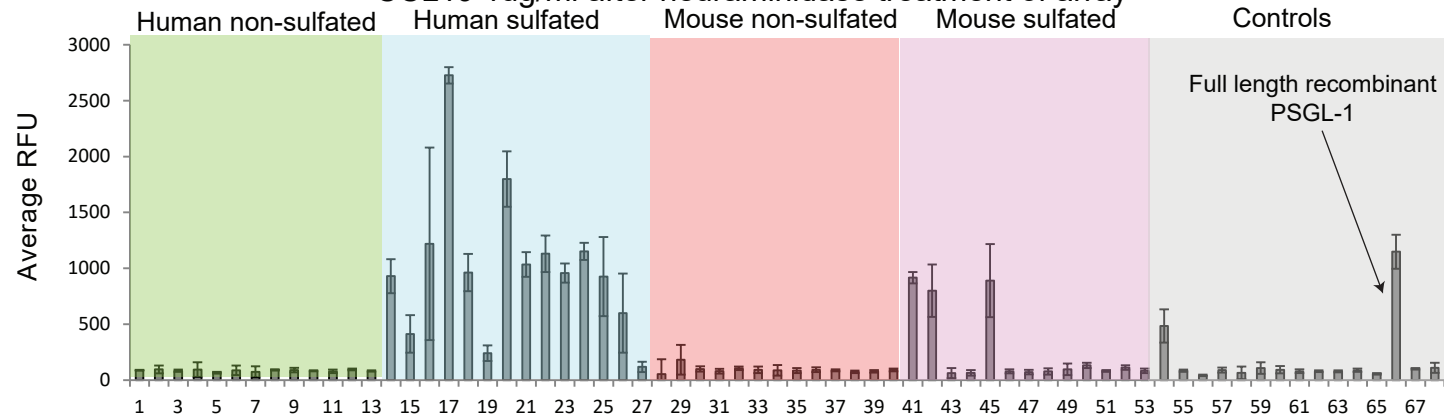

### CCL5 1ug/ml

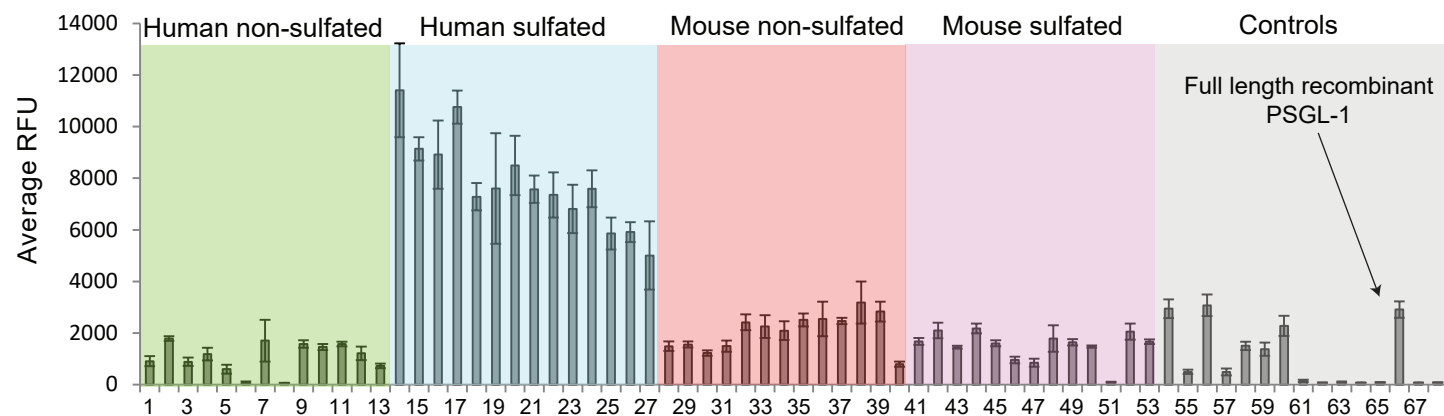

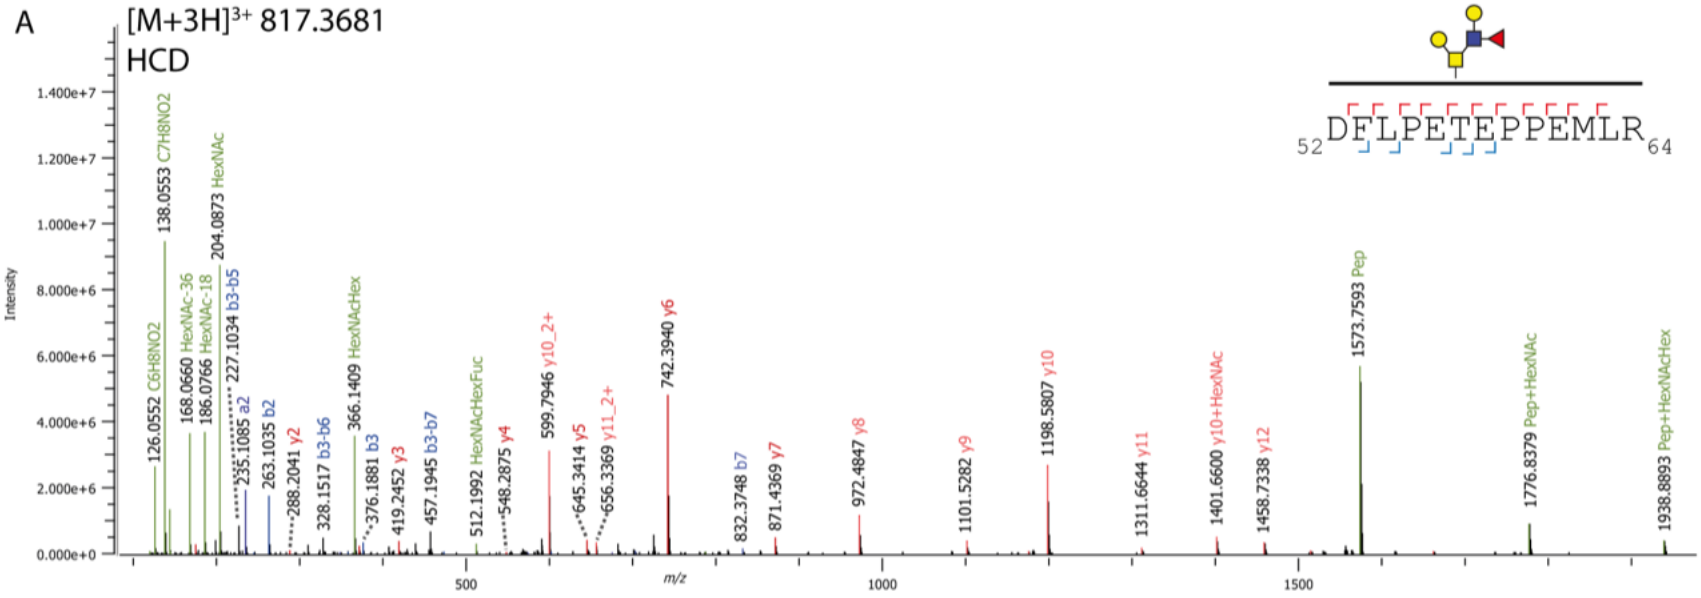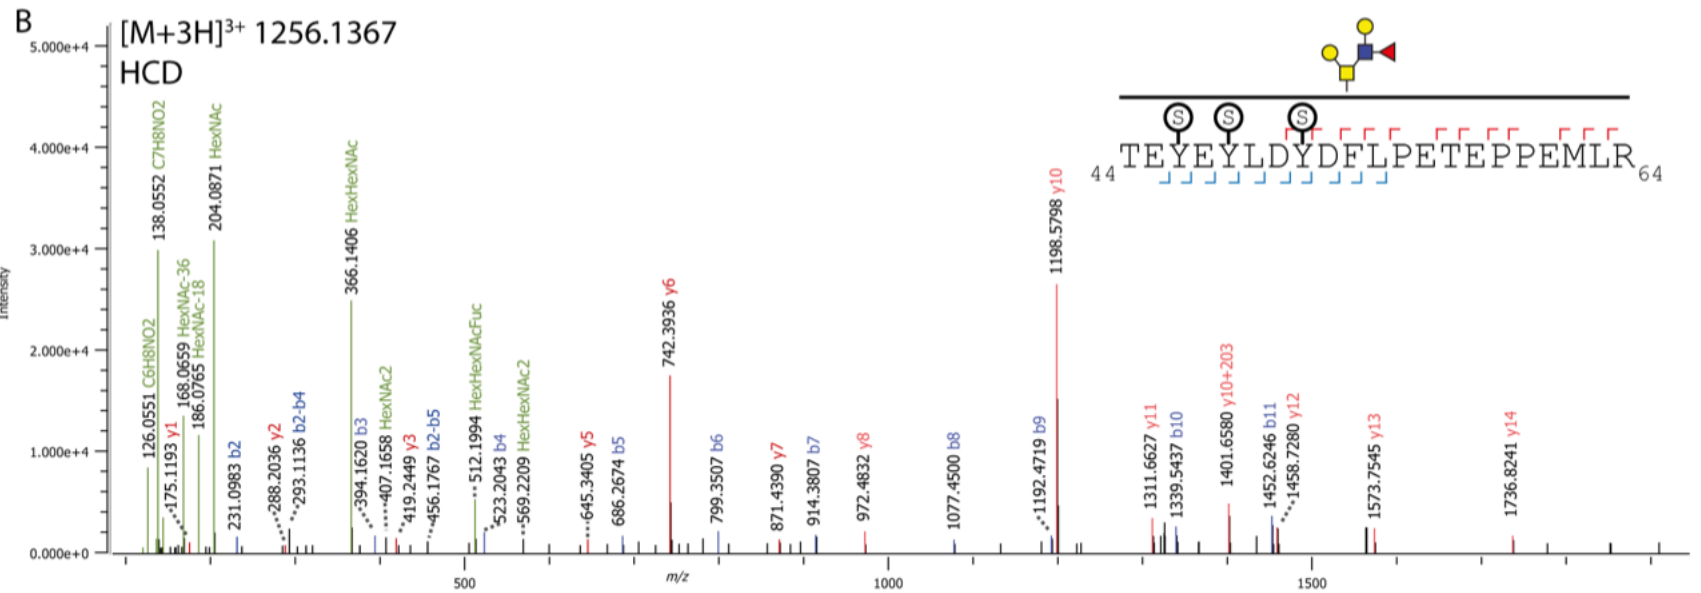

# Differences between binding of peptides with tyrosine sulfate and sulfonated tyrosine

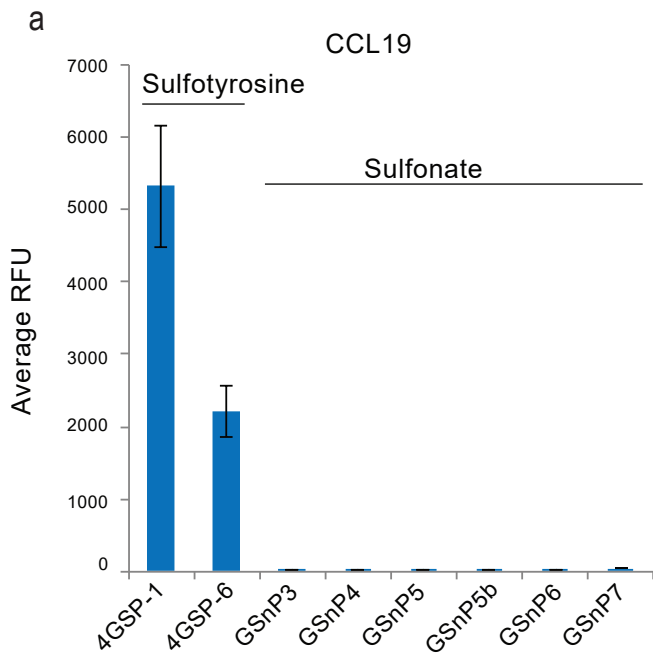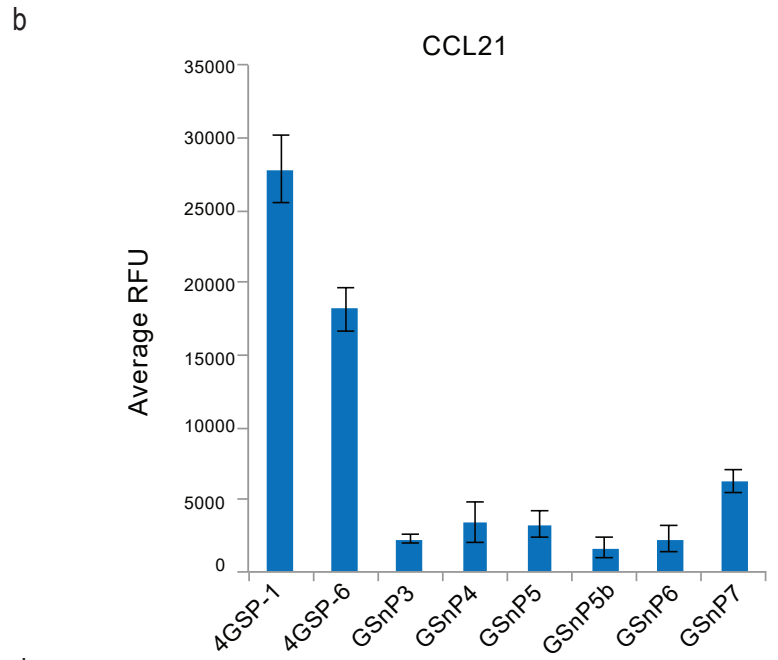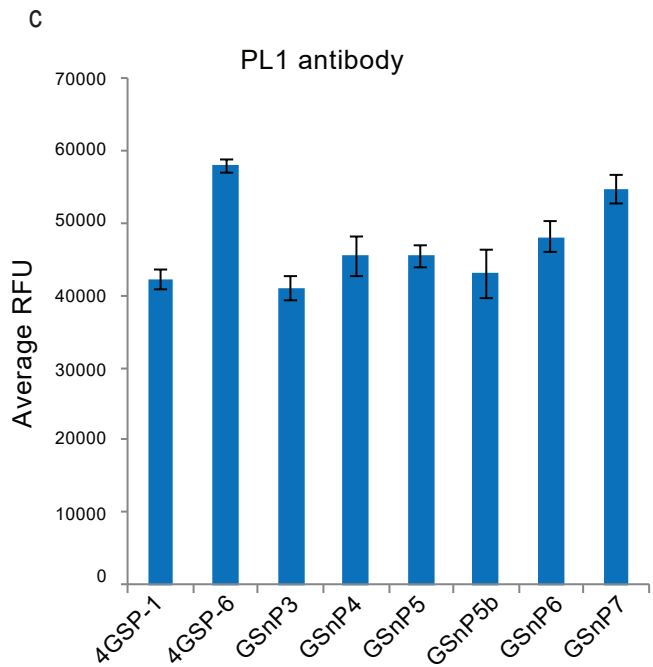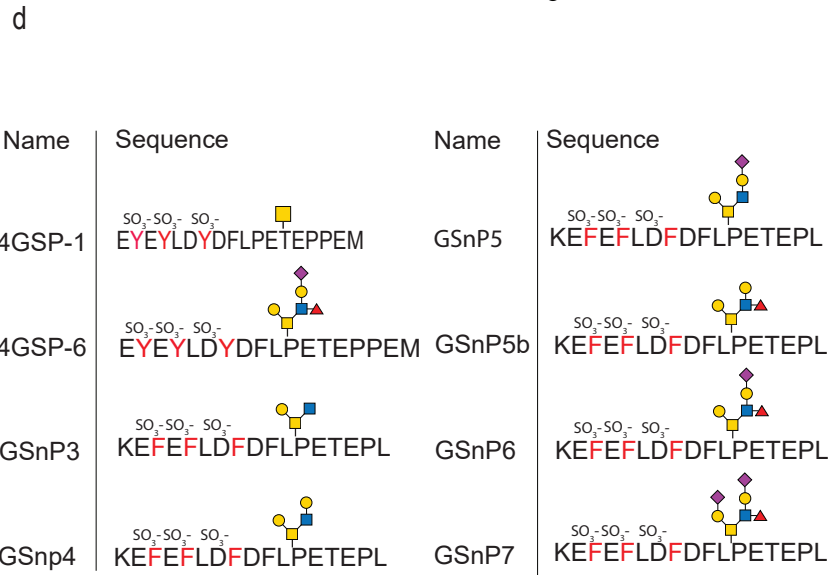



A

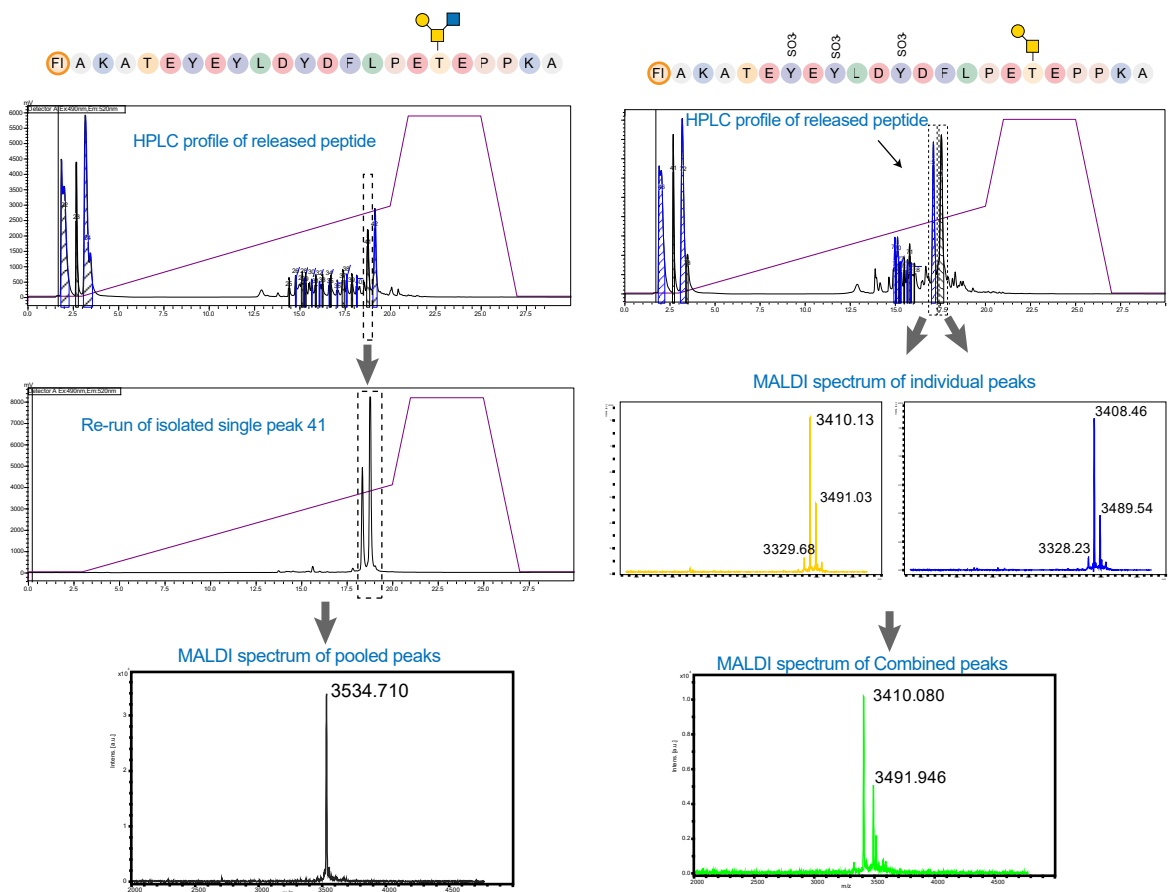

B

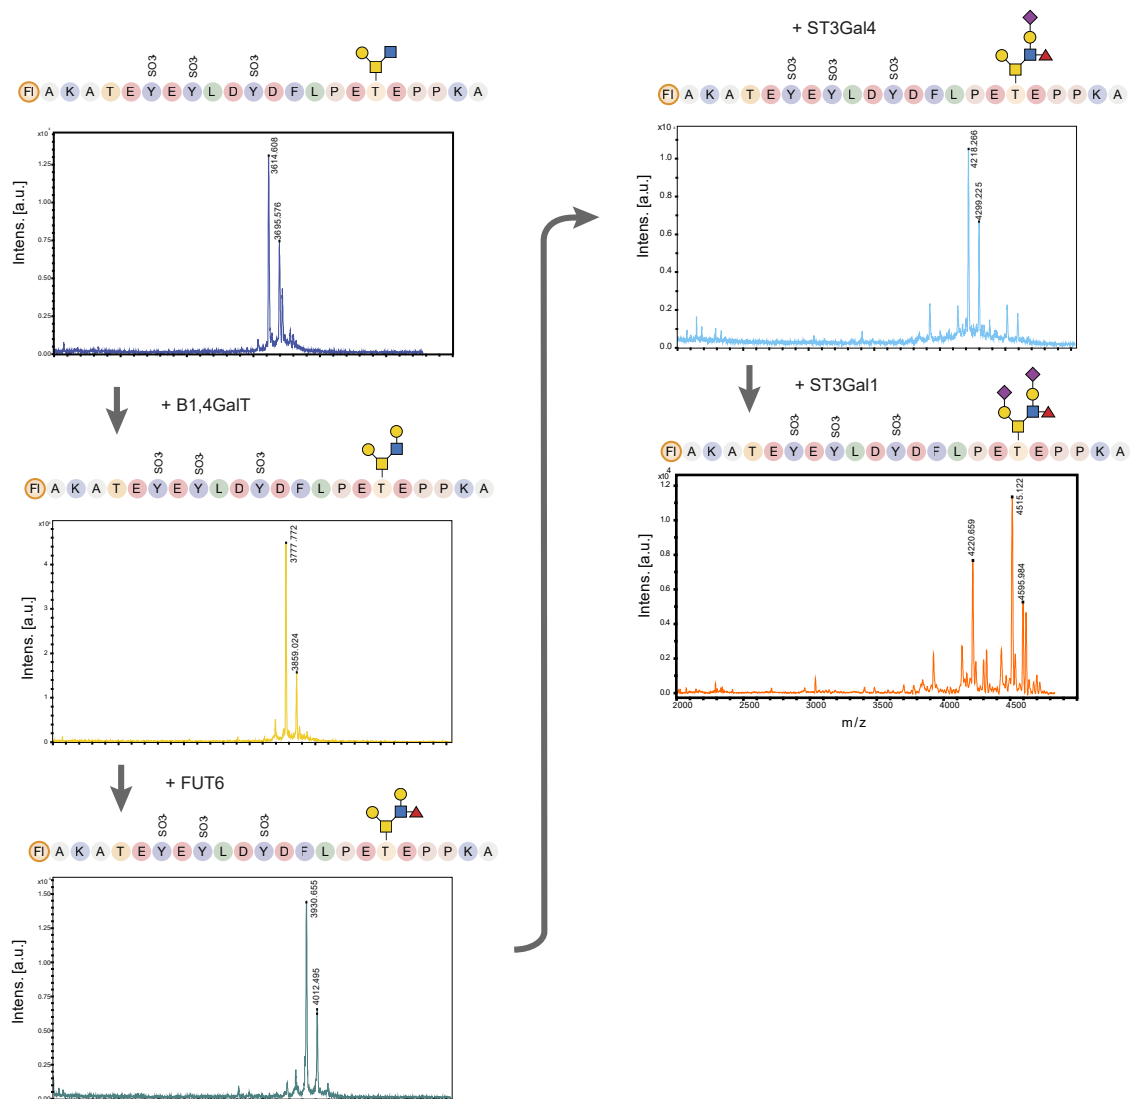

Table S1.

| #  | Name              | Sequence                                                                                                                |
|----|-------------------|-------------------------------------------------------------------------------------------------------------------------|
| 1  | h                 | <5(6)-FAM>NH-AKATEYEYLDYDFLPEEPPKA-CO<OCH3>                                                                             |
| 2  | h_GalNAc          | <5(6)-FAM>NH-AKATEYEYLDYDFLPE{GalNAca1-T}EPPKA-CO<OCH3>                                                                 |
| 3  | h_sTn             | <5(6)-FAM>NH-AKATEYEYLDYDFLPE{(Neu5Aca2-6)GalNAca1-T}EPPKA-CO<OCH3>                                                     |
| 4  | h_Core1           | <5(6)-FAM>NH-AKATEYEYLDYDFLPE{(Galb1-3)GalNAca1-T}EPPKA-CO<OCH3>                                                        |
| 5  | h_sT              | <5(6)-FAM>NH-AKATEYEYLDYDFLPE{(Neu5Aca2-3Galb1-3)GalNAca1-T}EPPKA-CO<OCH3>                                              |
| 6  | h_dsT             | <5(6)-FAM>NH-AKATEYEYLDYDFLPE{Neu5Aca2-6(Neu5Aca2-3Galb1-3)GalNAca1-T}EPPKA-CO<OCH3>                                    |
| 7  | h_Core2           | <5(6)-FAM>NH-AKATEYEYLDYDFLPE{GlcNAca1-6(Galb1-3)GalNAca1-T}EPPKA-CO<OCH3>                                              |
| 8  | h_Core2_Gal       | <5(6)-FAM>NH-AKATEYEYLDYDFLPE{Galb1-4GlcNAca1-6(Galb1-3)GalNAca1-T}EPPKA-CO<OCH3>                                       |
| 9  | h_Core2_SA        | <5(6)-FAM>NH-AKATEYEYLDYDFLPE{GlcNAca1-6(Neu5Aca2-3Galb1-3)GalNAca1-T}EPPKA-CO<OCH3>                                    |
| 10 | h_Core2_Gal_Fuc   | <5(6)-FAM>NH-AKATEYEYLDYDFLPE{Galb1-4(Fuca1-3)GlcNAca1-6(Galb1-3)GalNAca1-T}EPPKA-CO<OCH3>                              |
| 11 | h_Core2_Gal_SA    | <5(6)-FAM>NH-AKATEYEYLDYDFLPE{Neu5Aca2-3Galb1-4GlcNAca1-6(Neu5Aca2-3Galb1-3)GalNAca1-T}EPPKA-CO<OCH3>                   |
| 12 | h_slex            | <5(6)-FAM>NH-AKATEYEYLDYDFLPE{Neu5Aca2-3Galb1-4(Fuca1-3)GlcNAca1-6(Galb1-3)GalNAca1-T}EPPKA-CO<OCH3>                    |
| 13 | h_dslex           | <5(6)-FAM>NH-AKATEYEYLDYDFLPE{Neu5Aca2-3Galb1-4(Fuca1-3)GlcNAca1-6(Neu5Aca2-3Galb1-3)GalNAca1-T}EPPKA-CO<OCH3>          |
| 14 | h_S               | <5(6)-FAM>NH-AKATE{sY}E{sY}LD{sY}DFLPEEPPKA-CO<OCH3>                                                                    |
| 15 | h_S-GalNAc        | <5(6)-FAM>NH-AKATE{sY}E{sY}LD{sY}DFLPE{GalNAca1-T}EPPKA-CO<OCH3>                                                        |
| 16 | h_S-sTn           | <5(6)-FAM>NH-AKATE{sY}E{sY}LD{sY}DFLPE{(Neu5Aca2-6)GalNAca1-T}EPPKA-CO<OCH3>                                            |
| 17 | h_S-Core1         | <5(6)-FAM>NH-AKATE{sY}E{sY}LD{sY}DFLPE{(Galb1-3)GalNAca1-T}EPPKA-CO<OCH3>                                               |
| 18 | h_S-sT            | <5(6)-FAM>NH-AKATE{sY}E{sY}LD{sY}DFLPE{(Neu5Aca2-3Galb1-3)GalNAca1-T}EPPKA-CO<OCH3>                                     |
| 19 | h_S-dsT           | <5(6)-FAM>NH-AKATE{sY}E{sY}LD{sY}DFLPE{Neu5Aca2-6(Neu5Aca2-3Galb1-3)GalNAca1-T}EPPKA-CO<OCH3>                           |
| 20 | h_S-Core2         | <5(6)-FAM>NH-AKATE{sY}E{sY}LD{sY}DFLPE{GlcNAca1-6(Galb1-3)GalNAca1-T}EPPKA-CO<OCH3>                                     |
| 21 | h_S-Core2_Gal     | <5(6)-FAM>NH-AKATE{sY}E{sY}LD{sY}DFLPE{Galb1-4GlcNAca1-6(Galb1-3)GalNAca1-T}EPPKA-CO<OCH3>                              |
| 22 | h_S-Core2_SA      | <5(6)-FAM>NH-AKATE{sY}E{sY}LD{sY}DFLPE{GlcNAca1-6(Neu5Aca2-3Galb1-3)GalNAca1-T}EPPKA-CO<OCH3>                           |
| 23 | h_S-Core2_Gal_fuc | <5(6)-FAM>NH-AKATE{sY}E{sY}LD{sY}DFLPE{Galb1-4(Fuca1-3)GlcNAca1-6(Galb1-3)GalNAca1-T}EPPKA-CO<OCH3>                     |
| 24 | h_S-Core2_Gal_SA  | <5(6)-FAM>NH-AKATE{sY}E{sY}LD{sY}DFLPE{Neu5Aca2-3Galb1-4GlcNAca1-6(Neu5Aca2-3Galb1-3)GalNAca1-T}EPPKA-CO<OCH3>          |
| 25 | h_S-slex          | <5(6)-FAM>NH-AKATE{sY}E{sY}LD{sY}DFLPE{Neu5Aca2-3Galb1-4(Fuca1-3)GlcNAca1-6(Galb1-3)GalNAca1-T}EPPKA-CO<OCH3>           |
| 26 | h_S-dslex         | <5(6)-FAM>NH-AKATE{sY}E{sY}LD{sY}DFLPE{Neu5Aca2-3Galb1-4(Fuca1-3)GlcNAca1-6(Neu5Aca2-3Galb1-3)GalNAca1-T}EPPKA-CO<OCH3> |

|    |                   |                                                                                                                                                              |
|----|-------------------|--------------------------------------------------------------------------------------------------------------------------------------------------------------|
| 27 | h_S-2Xslex        | <5(6)-FAM>NH-AKA{Neu5Aca2-3Galb1-4(Fuca1-3)GlcNAca1-6(Galb1-3)GalNAca1-T}EYEYLDYDFLPE{Neu5Aca2-3Galb1-4(Fuca1-3)GlcNAca1-6(Galb1-3)GalNAca1-T}EPPKA-CO<OCH3> |
| 28 | m                 | <5(6)-FAM>NH-AKVGDDDFEDPDYTYNTDPPKA-CO<OCH3>                                                                                                                 |
| 29 | m-GalNAc          | <5(6)-FAM>NH-AKVGDDDFEDPDYTYN{GalNAca1-T}DPPKA-CO<OCH3>                                                                                                      |
| 30 | m-sTn             | <5(6)-FAM>NH-AKVGDDDFEDPDYTYN{(Neu5Aca2-6)GalNAca1-T}DPPKA-CO<OCH3>                                                                                          |
| 31 | m-Core1           | <5(6)-FAM>NH-AKVGDDDFEDPDYTYN{(Galb1-3)GalNAca1-T}DPPKA-CO<OCH3>                                                                                             |
| 32 | m-sT              | <5(6)-FAM>NH-AKVGDDDFEDPDYTYN{(Neu5Aca2-3Galb1-3)GalNAca1-T}DPPKA-CO<OCH3>                                                                                   |
| 33 | m-dsT             | <5(6)-FAM>NH-AKVGDDDFEDPDYTYN{Neu5Aca2-6(Neu5Aca2-3Galb1-3)GalNAca1-T}DPPKA-CO<OCH3>                                                                         |
| 34 | m-Core2           | <5(6)-FAM>NH-AKVGDDDFEDPDYTYN{GlcNAca1-6(Galb1-3)GalNAca1-T}DPPKA-CO<OCH3>                                                                                   |
| 35 | m-Core2_Gal       | <5(6)-FAM>NH-AKVGDDDFEDPDYTYN{Galb1-4GlcNAca1-6(Galb1-3)GalNAca1-T}DPPKA-CO<OCH3>                                                                            |
| 36 | m-Core2_SA        | <5(6)-FAM>NH-AKVGDDDFEDPDYTYN{GlcNAca1-6(Neu5Aca2-3Galb1-3)GalNAca1-T}DPPKA-CO<OCH3>                                                                         |
| 37 | m-Core2_Gal_Fuc   | <5(6)-FAM>NH-AKVGDDDFEDPDYTYN{Galb1-4(Fuca1-3)GlcNAca1-6(Galb1-3)GalNAca1-T}DPPKA-CO<OCH3>                                                                   |
| 38 | m-Core2_Gal_SA    | <5(6)-FAM>NH-AKVGDDDFEDPDYTYN{Neu5Aca2-3Galb1-4GlcNAca1-6(Neu5Aca2-3Galb1-3)GalNAca1-T}DPPKA-CO<OCH3>                                                        |
| 39 | m-slex            | <5(6)-FAM>NH-AKVGDDDFEDPDYTYN{Neu5Aca2-3Galb1-4(Fuca1-3)GlcNAca1-6(Galb1-3)GalNAca1-T}DPPKA-CO<OCH3>                                                         |
| 40 | m-dslex           | <5(6)-FAM>NH-AKVGDDDFEDPDYTYN{Neu5Aca2-3Galb1-4(Fuca1-3)GlcNAca1-6(Neu5Aca2-3Galb1-3)GalNAca1-T}DPPKA-CO<OCH3>                                               |
| 41 | m_S               | <5(6)-FAM>NH-AKVGDDDFEDPD{sY}T{sY}NTDPPKA-CO<OCH3>                                                                                                           |
| 42 | m_SGalNAc         | <5(6)-FAM>NH-AKVGDDDFEDPD{sY}T{sY}N{GalNAca1-T}DPPKA-CO<OCH3>                                                                                                |
| 43 | m_S-sTn           | <5(6)-FAM>NH-AKVGDDDFEDPD{sY}T{sY}N{(Neu5Aca2-6)GalNAca1-T}DPPKA-CO<OCH3>                                                                                    |
| 44 | m_S-Core1         | <5(6)-FAM>NH-AKVGDDDFEDPD{sY}T{sY}N{(Galb1-3)GalNAca1-T}DPPKA-CO<OCH3>                                                                                       |
| 45 | m_S-sT            | <5(6)-FAM>NH-AKVGDDDFEDPD{sY}T{sY}N{(Neu5Aca2-3Galb1-3)GalNAca1-T}DPPKA-CO<OCH3>                                                                             |
| 46 | m_S-dsT           | <5(6)-FAM>NH-AKVGDDDFEDPD{sY}T{sY}N{Neu5Aca2-6(Neu5Aca2-3Galb1-3)GalNAca1-T}DPPKA-CO<OCH3>                                                                   |
| 47 | m_S-Core2         | <5(6)-FAM>NH-AKVGDDDFEDPD{sY}T{sY}N{GlcNAca1-6(Galb1-3)GalNAca1-T}DPPKA-CO<OCH3>                                                                             |
| 48 | m_S-Core2_Gal     | <5(6)-FAM>NH-AKVGDDDFEDPD{sY}T{sY}N{Galb1-4GlcNAca1-6(Galb1-3)GalNAca1-T}DPPKA-CO<OCH3>                                                                      |
| 49 | m_S-Core2_SA      | <5(6)-FAM>NH-AKVGDDDFEDPD{sY}T{sY}N{GlcNAca1-6(Neu5Aca2-3Galb1-3)GalNAca1-T}DPPKA-CO<OCH3>                                                                   |
| 50 | m_S-Core2_Gal_Fuc | <5(6)-FAM>NH-AKVGDDDFEDPD{sY}T{sY}N{Galb1-4(Fuca1-3)GlcNAca1-6(Galb1-3)GalNAca1-T}DPPKA-CO<OCH3>                                                             |
| 51 | m_S-Core2_Gal_SA  | <5(6)-FAM>NH-AKVGDDDFEDPD{sY}T{sY}N{Neu5Aca2-3Galb1-4GlcNAca1-6(Neu5Aca2-3Galb1-3)GalNAca1-T}DPPKA-CO<OCH3>                                                  |
| 52 | m_S-slex          | <5(6)-FAM>NH-AKVGDDDFEDPD{sY}T{sY}N{Neu5Aca2-3Galb1-4(Fuca1-3)GlcNAca1-6(Galb1-3)GalNAca1-T}DPPKA-CO<OCH3>                                                   |
| 53 | m_S-dslex         | <5(6)-FAM>NH-AKVGDDDFEDPD{sY}T{sY}N{Neu5Aca2-3Galb1-4(Fuca1-3)GlcNAca1-6(Neu5Aca2-3Galb1-3)GalNAca1-T}DPPKA-CO<OCH3>                                         |

|    |                |                                                                                              |
|----|----------------|----------------------------------------------------------------------------------------------|
| 54 | hCCR_7_s       | <5(6)-FAM>NH-AKDD{sY}IGDNTTVD{sY}TLFESLKA-CO<OCH3>                                           |
| 55 | hCCR7          | <5(6)-FAM>NH-AKDDYIGDNTTVDYTLFESLKA-CO<OCH3>                                                 |
| 56 | mCCR7_S        | <5(6)-FAM>NH-AKDD{sY}IGENTTVD{sY}TL{sY}ESVKA-CO<OCH3>                                        |
| 57 | mCCR7          | <5(6)-FAM>NH-AKDDYIGENTTVDYTLYESVKA-CO<OCH3>                                                 |
| 58 | hCCR10_S       | <5(6)-FAM>NH-AKGH{sY}SGDEEDA{sY}SAEPLPEKA-CO<OCH3>                                           |
| 59 | hCCR10         | <5(6)-FAM>NH-AKGHYSGDEEDAYSAEPLPEKA-CO<OCH3>                                                 |
| 60 | mCCR10_s       | <5(6)-FAM>NH-AKGL{sY}SG{sY}DEEA{sY}SVGPLPEKA-CO<OCH3>                                        |
| 61 | mCCR10         | <5(6)-FAM>NH-AKGLYSGYDEEAYSVGPLPEKA-CO<OCH3>                                                 |
| 62 | 4GP1           | NH2-EYEYLDYDFLPE{GalNAca1-T}EPPEM-COOH                                                       |
| 63 | 4GSP1          | NH2-E{sY}E{sY}LD{sY}DFLPE{GalNAca1-T}EPPEM-COOH                                              |
| 64 | 4GSP1_core2_SA | NH2-E{sY}E{sY}LD{sY}DFLPE{Neu5Aca2-3Galb1-4GlcNAca1-6(Galb1-3)GalNAca1-T}EPPEM-COOH          |
| 65 | 4GSP1_slex     | NH2-E{sY}E{sY}LD{sY}DFLPE{Neu5Aca2-3Galb1-4(Fuca1-3)GlcNAca1-6(Galb1-3)GalNAca1-T}EPPEM-COOH |
|    |                |                                                                                              |
|    | <b>Key</b>     |                                                                                              |
|    | NH2-           | N-terminus                                                                                   |
|    | -COOH          | C-terminus                                                                                   |
|    | <5(6)-FAM>NH-  | N-terminus modified with 5(6)-FAM                                                            |
|    | -CO<OCH3>      | C-terminus with O-methyl ester                                                               |
|    | {...}          | Modified amino acid (unless {sY} it is glycosylated)                                         |
|    | {sY}           | Tyrosine Sulfate                                                                             |

Table S2.

### Summary of calculated, observed and calibrated masses

| Peptide name        | ID | Theor. Mass | Obs. Mass | Calib. Obs. mass* | Nr. of sulfates |
|---------------------|----|-------------|-----------|-------------------|-----------------|
| h                   | 1  | 2961.287    | 2961.08   | 2962.177          | -               |
| h_GalNac            | 2  | 3164.367    | 3166.43   | 3165.313          | -               |
| h_sTn               | 3  | 3455.462    | 3457.46   | 3453.205          | -               |
| h_core1             | 4  | 3326.42     | 3329.5    | 3326.624          | -               |
| h_sT                | 5  | 3617.515    | 3625.66   | 3619.591          | -               |
| h_dsT               | 6  | 3908.611    | 3917.39   | 3908.176          | -               |
| h_core2             | 7  | 3529.499    | 3534.71   | 3529.622          | -               |
| h_core2_gal         | 8  | 3691.552    | 3694.48   | 3687.669          | -               |
| h_Core2_Gal_SA      | 9  | 3982.647    | 3989.89   | 3979.894          | -               |
| h_Core2_Gal_Fuc     | 10 | 3837.61     | 3845.28   | 3836.843          | -               |
| h_Core2_Gal_SA_SA   | 11 | 4273.743    | 4284.52   | 4271.347          | -               |
| h_sLeX              | 12 | 4128.705    | 4140      | 4128.386          | -               |
| h_dsLeX             | 13 | 4419.801    | 4434.84   | 4420.047          | -               |
| h_S                 | 14 | 3121.201    | 3124.02   | 3123.360          | 2               |
| h_S_GalNac          | 15 | 3324.28     | 3328.228  | 3325.367          | 2               |
| h_S_sTn             | 16 | 3615.376    | 3622.57   | 3616.535          | 2               |
| h_S_core1           | 17 | 3486.333    | 3491.95   | 3487.323          | 2               |
| h_S_sT              | 18 | 3777.429    | 3785.36   | 3777.570          | 2               |
| h_S_dsT             | 19 | 4068.524    | 4082.71   | 4071.713          | 2               |
| h_S_core2           | 20 | 3689.413    | 3695.58   | 3688.758          | 2               |
| h_S_core2_gal       | 21 | 3851.466    | 3859.02   | 3850.435          | 2               |
| h_S_Core2_Gal_SA    | 22 | 4142.561    | 4152.49   | 4140.741          | 2               |
| h_S_Core2_Gal_Fuc   | 23 | 3997.523    | 4012.5    | 4002.260          | 2               |
| h_S_Core2_Gal_SA_SA | 24 | 4433.656    | 4447.63   | 4432.699          | 2               |
| h_S_sLeX            | 25 | 4288.619    | 4299.23   | 4285.899          | 2               |
| h_S_dsLeX           | 26 | 4579.714    | 4595.98   | 4579.449          | 2               |
| h_S_2X sLeX         | 27 | 5456.037    | 5486.33   | 5460.199          | 2               |
| m                   | 28 | 2844.132    | 2844.37   | 2846.726          | -               |
| m_GalNac            | 29 | 3047.211    | 3048.44   | 3048.595          | -               |
| m_sTn               | 30 | 3338.307    | 3338.87   | 3335.894          | -               |
| m_Core1             | 31 | 3209.264    | 3209.92   | 3208.334          | -               |
| m_sT                | 32 | 3500.359    | 3505.7    | 3500.925          | -               |
| m_dsT               | 33 | 3791.455    | 3795.98   | 3788.075          | -               |
| m_core-2            | 34 | 3412.343    | 3415.18   | 3411.381          | -               |
| m_core-2_Gal        | 35 | 3574.396    | 3577.4    | 3571.852          | -               |
| m_core-2_SA         | 36 | 3703.439    | 3708.6    | 3701.637          | -               |
| m_Core2_Gal_Fuc     | 37 | 3720.454    | 3725.68   | 3718.533          | -               |
| m_Core2_Gal_SA_SA   | 38 | 4156.587    | 4167.86   | 4155.945          | -               |
| m_sLeX              | 39 | 4011.549    | 4022.55   | 4012.202          | -               |
| m_dsLeX             | 40 | 4302.645    | 4320.05   | 4306.494          | -               |
| m_S                 | 41 | 2924.089    | 2920.45   | 2921.985          | 1               |
| m_S_GalNac          | 42 | 3127.168    | 3129.35   | 3128.633          | 1               |
| m_S_sTn             | 43 | 3418.263    | 3422.72   | 3418.840          | 1               |
| m_S_Core1           | 44 | 3289.221    | 3292.29   | 3289.816          | 1               |
| m_S_sT              | 45 | 3580.316    | 3586.83   | 3581.180          | 1               |
| m_S_dsT             | 46 | 3871.412    | 3880.79   | 3871.971          | 1               |

|                     |    |          |         |          |   |
|---------------------|----|----------|---------|----------|---|
| m_S_Core-2          | 47 | 3492.3   | 3497.4  | 3492.714 | 1 |
| m_S_core-2_Gal      | 48 | 3654.353 | 3658.68 | 3652.255 | 1 |
| m_S_core-2_SA       | 49 | 3783.396 | 3788.93 | 3781.101 | 1 |
| m_S_Core2_Gal_Fuc   | 50 | 3800.411 | 3808.27 | 3800.233 | 1 |
| m_S_Core2_Gal_SA_SA | 51 | 4236.544 | 4249.33 | 4236.537 | 1 |
| m_S_sLeX            | 52 | 4091.506 | 4103.7  | 4092.477 | 1 |
| m_S_dsLeX           | 53 | 4382.602 | 4398.09 | 4383.693 | 1 |
| CCR7_hum_sulf       | 54 | 2930.208 | 2932.17 | 2933.579 | 2 |
| CCR7_hum            | 55 | 2850.251 | 2847.49 | 2849.812 | - |
| CCR7_mouse_sulf     | 56 | 3026.16  | 3025.86 | 3026.259 | - |
| CCR7_mouse          | 57 | 2866.246 | 2865.02 | 2867.153 | 1 |
| CCR10_hum_sulf      | 58 | 2815.083 | 2812.42 | 2815.120 | - |
| CCR10_hum           | 59 | 2735.127 | 2731.67 | 2735.241 | - |
| CCR10_mouse_sulf    | 60 | 2875.112 | 2871.48 | 2873.543 | 2 |
| CCR10_mouse         | 61 | 2715.198 | 2712.7  | 2716.475 | - |
